# Supplementary material for: Complement Factor H-Related 3 Enhanced Inflammation and Complement Activation in Human RPE Cells
Source: PubMed Central journal article supplement (PMC8606654; doi:10.3389/fimmu.2021.769242), 2021-11-08
Supplement: DataSheet_1.pdf [file DataSheet_1.pdf]

Supplementary Material

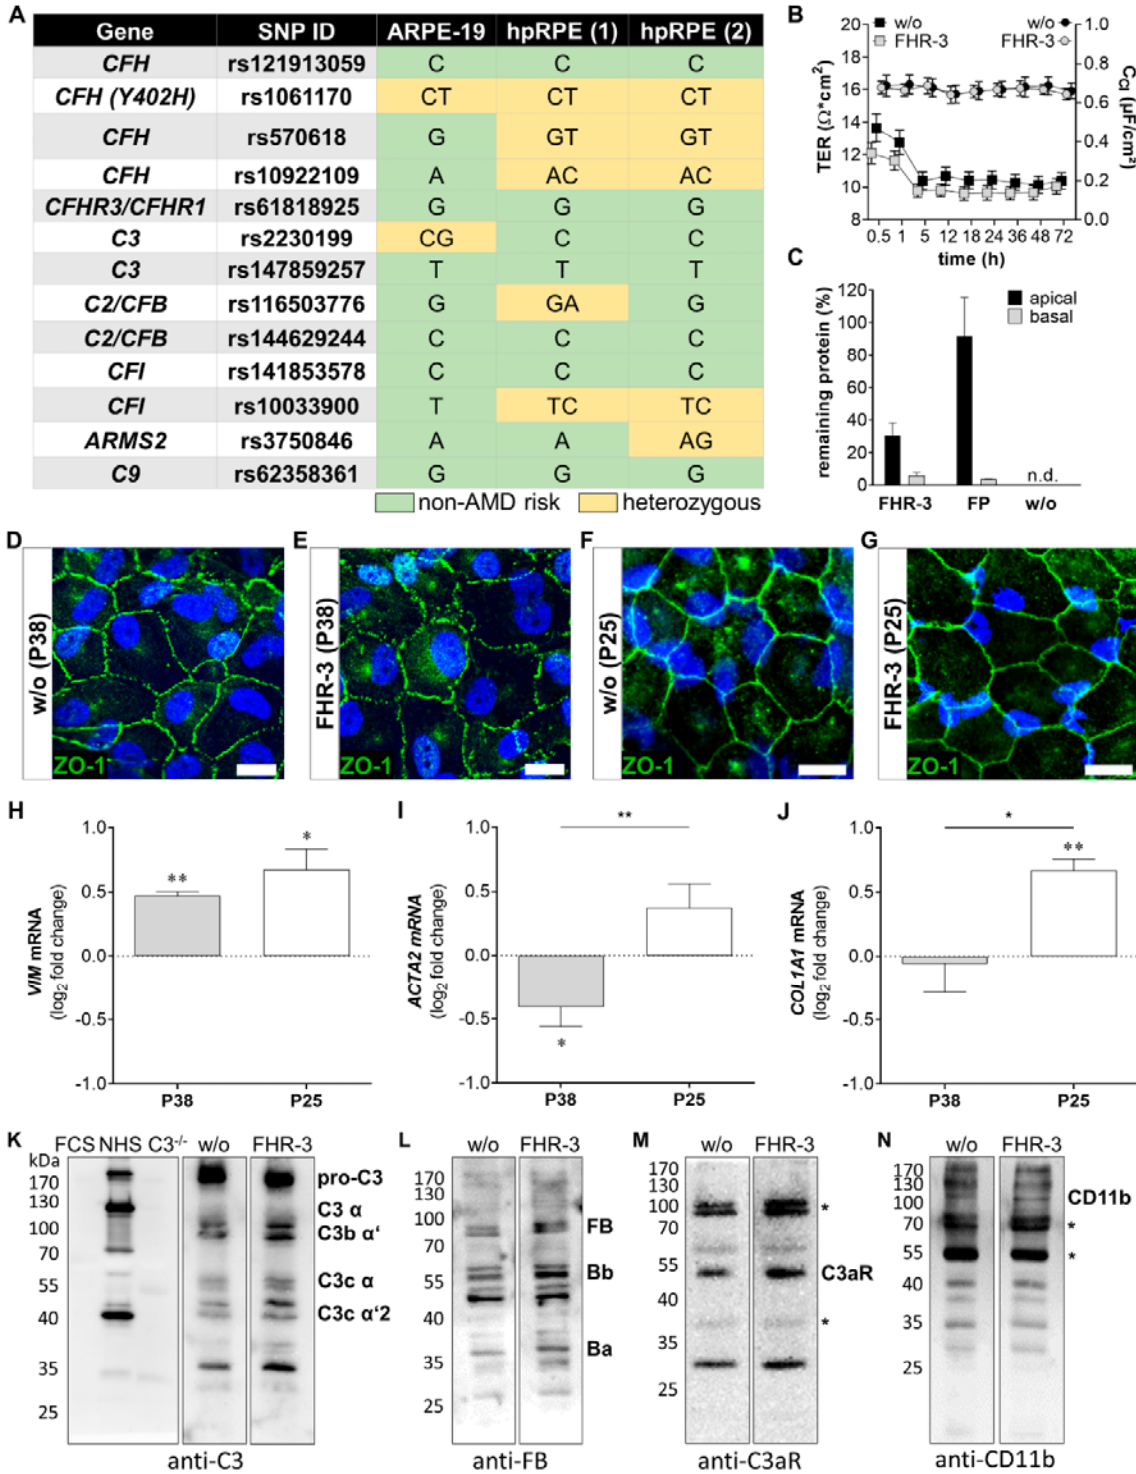

Supplementary Figure 1: Characterization of investigated ARPE-19 and hpRPE cells.

(A) Genotyping of all used cells (ARPE-19 cells, human primary RPE cells: hpRPE (1), hpRPE (2)) was performed for the most common AMD-associated complement SNPs. All typings resulted either in non- (green) or heterozygous-AMD risk SNPs (yellow). (B, square) Transepithelial resistance (TER) and (B, circle) cellular capacitance ( $C_{Cl}$ ) were measured for w/o and FHR-3 treated cells for 0.5 h – 72 h. FHR-3 had no effect on (B, square) TER and (B, circle)  $C_{Cl}$ . (C) ARPE-19 cells were incubated for 24 h with either FHR-3 or Properdin (FP) as control protein. Only 30% of the incubated FHR-3 could be detected in the apical supernatant, whereas 92% of apically incubated properdin was still detectable. (D – G) Polarized ARPE-19 cells, either (D, E) high-passage (P38) or (F, G) low-passage (P25), showed an intact monolayer when tight junction protein zonula occludens-1 (ZO-1) was immunohistochemically detected (green), in both (D, F) w/o and (E, G) FHR-3 treated cells. (H – J) FHR-3 increased EMT marker mRNA expression (H) *VIM* in high-passage ARPE-19 cells (P38), and (H) *VIM*, (I) *ACTA2*, (J) *COL1A1* in low-passage ARPE-19 cells (P25) 24 h after incubation compared to w/o. (K – N) Western Blots of ARPE-19 cell lysates detected (K) pro-C3 (190 kDa), C3b (101 kDa), and C3c fragments (61 kDa, 39 kDa). No detection was observed in FCS used for cell cultivation and in C3<sup>-/-</sup> Serum, (L) FB (95 kDa), and cleavage products Bb (60 kDa) and Ba (35 kDa), (M) C3aR (54 kDa) and C3aR glycosylations (stars, 40 - 100 kDa), (N) subunit CD11b (120 kDa) of complement receptor 3 (CR3) and cleavage products (stars). All proteins could be observed in w/o and FHR-3 treated cells, under serum-free conditions (exemplarily shown 5 h post-treatment). FCS fetal calf serum. NHS normal human serum. C3<sup>-/-</sup> C3-depleted human serum. Scale bars 40 $\mu$ m. w/o untreated control (dotted line). Mean with standard deviation is shown. \*\*p < 0.01, \*p < 0.05. (H – J) unpaired t-test (n = 3); (C) interpolated against the respective standard curve.

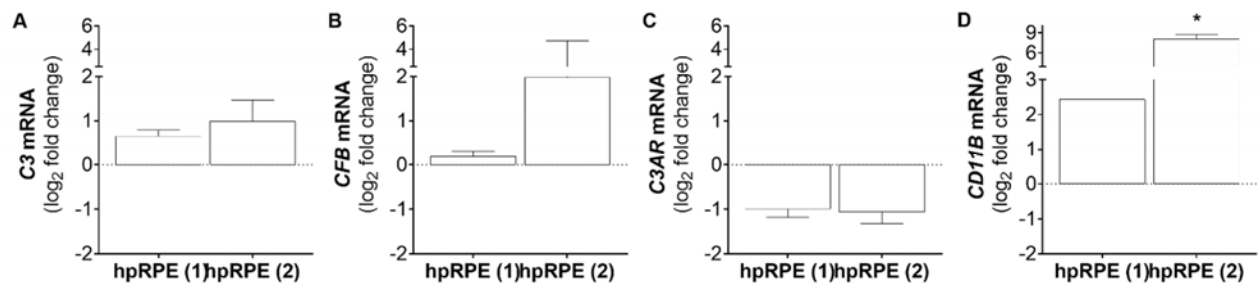

**Supplementary Figure 2: FHR-3 increases mRNA expression of *C3*, *CFB*, *C3AR* and *CD11B* in hRPE cells.**

(A) *C3*, (B) *CFB* and (D) *CD11B* mRNA expression was increased in two different human primary RPE cells (hpRPE (1), hpRPE (2)) after FHR-3 incubation (5 h) compared to the untreated controls (dotted line). (C) Expression of *C3AR*, in contrast, was decreased. \* $p < 0.05$ . Wilcoxon matched-pairs signed rank test ( $n = 3$ ).

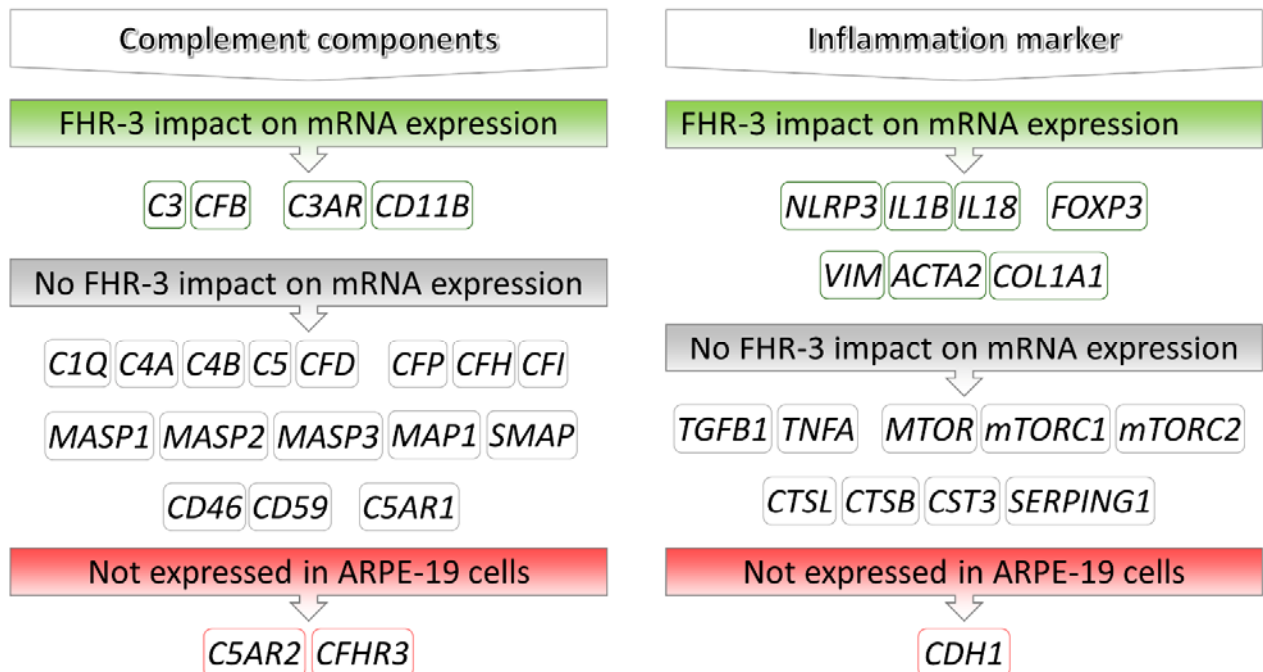

**Supplementary Figure 3: Overview of investigated mRNA expression in ARPE-19 cells and impact of FHR-3 on their transcript levels.**

Shown in green are all transcripts whose expression has been altered due to FHR-3 treatment. In grey are all genes whose mRNA expression has not been influenced by FHR-3 and in red are all genes that are not expressed in ARPE-19 cells at the mRNA level in this study.

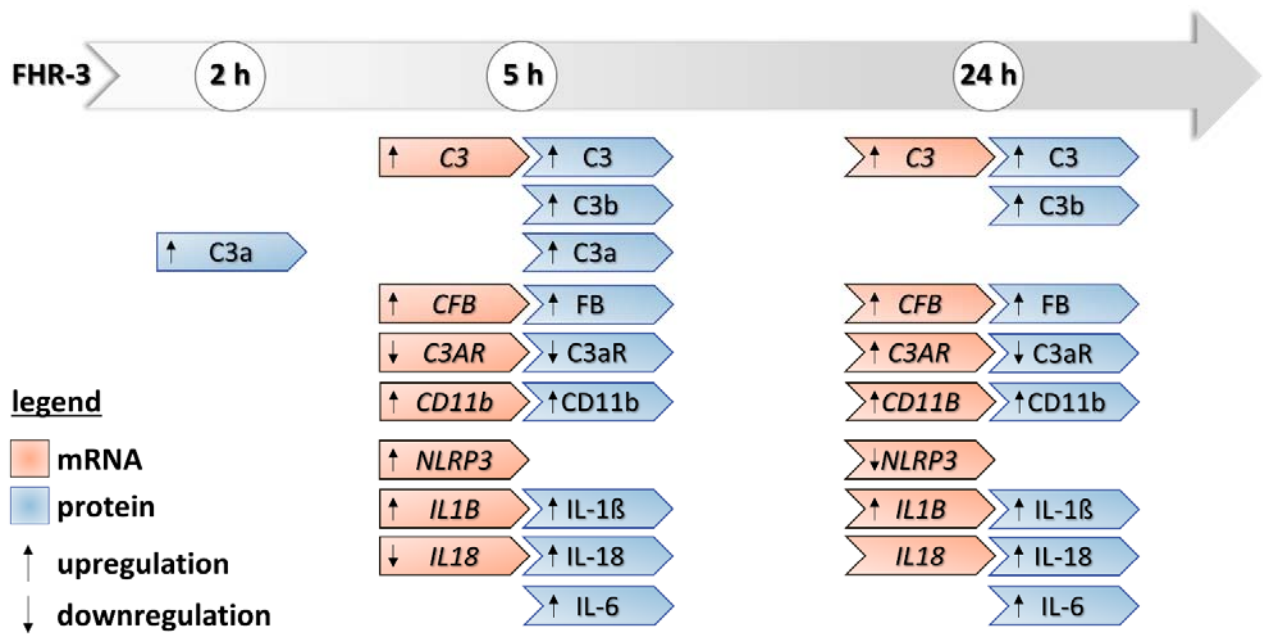

**Supplementary Figure 4: Timeline of FHR-3-treated ARPE-19 cells with RNA and protein regulation of complement components and inflammation markers.**

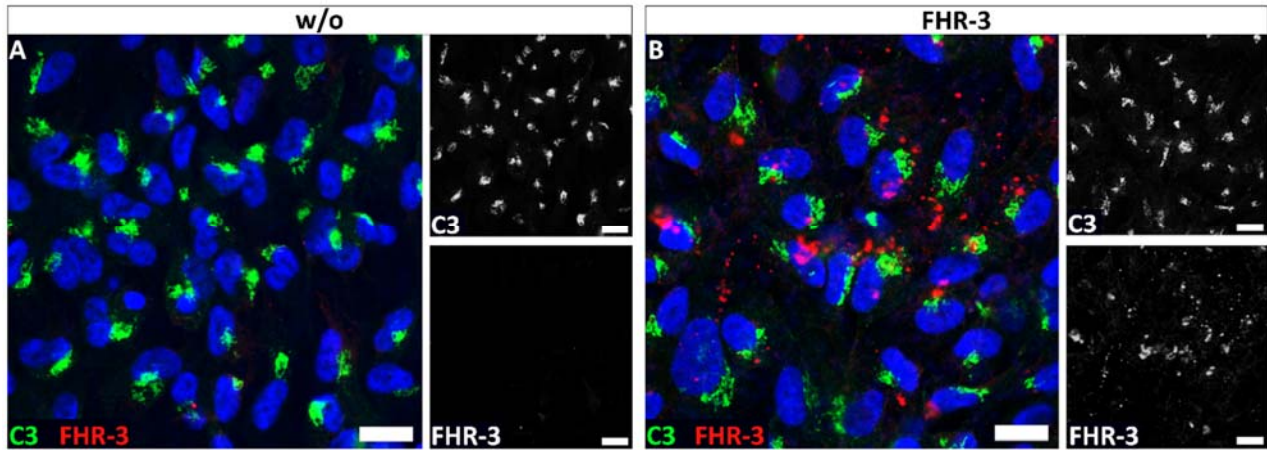

**Supplementary Figure 5: FHR-3 did not co-localize with C3 in ARPE-19 cells.**

Intracellular C3 (green) was detected by immunofluorescence in (A) untreated and (B) FHR-3 treated (24 h) ARPE-19 cells. FHR-3 was solely detected in (B) FHR-3 treated ARPE-19 cells by using anti-FHR-3 antibody RETC-2. Co-localization of C3 and FHR-3 could not be shown in ARPE-19 cells by immunofluorescence. Scale bars 40  $\mu\text{m}$ . w/o untreated control.

**Supplementary Table 1: PCR and RT-qPCR primers**

| <b>transcript</b> | <b>name or sequence</b>                                     | <b>Catalogue number</b> | <b>Usage/Company</b>           |
|-------------------|-------------------------------------------------------------|-------------------------|--------------------------------|
| <i>C1QB</i>       | Hs_C1QB_1_SG                                                | QT00003493              | RT-qPCR/<br>Qiagen             |
| <i>C3</i>         | Hs_C3_1_SG                                                  | QT00089698              |                                |
| <i>C3AR</i>       | Hs_C3AR1_1_SG                                               | QT00090398              |                                |
| <i>C4A</i>        | Hs_C4A_1_SG                                                 | QT00237160              |                                |
| <i>C5</i>         | Hs_C5AR2_1_SG                                               | QT00243971              |                                |
| <i>C5AR1</i>      | Hs_C5R1_1_SG                                                | QT00997766              |                                |
| <i>C5AR2</i>      | Hs_C5AR2_1_SG                                               | QT00243971              |                                |
| <i>CD11B</i>      | Hs_ITGAM_1_SG                                               | QT00031500              |                                |
| <i>CD46</i>       | Hs_MCP_1_SG                                                 | QT00073689              |                                |
| <i>CD59</i>       | Hs_CD59_1_SG                                                | QT00035952              |                                |
| <i>CFB</i>        | Hs_BF_1_SG                                                  | QT00012138              |                                |
| <i>CFD</i>        | Hs_CFD_1_SG                                                 | QT00212191              |                                |
| <i>CFH</i>        | Hs_CFH_1_SG                                                 | QT00001624              |                                |
| <i>CFHR3</i>      | Hs_CFHR3_1_SG                                               | QT00001631              |                                |
| <i>CFI</i>        | Hs_CFI_1_SG                                                 | QT00213794              |                                |
| <i>CFP</i>        | Hs_CFP_1_SG                                                 | QT00010514              |                                |
| <i>CST3</i>       | Hs_CST3_1_SG                                                | QT00046438              |                                |
| <i>CTSB</i>       | Hs_CTSB_1_SG                                                | QT00088641              |                                |
| <i>CTSL</i>       | Hs_CTSL_1_SG                                                | QT01664978              |                                |
| <i>FOXP3</i>      | Hs_FOXP3_1_SG                                               | QT00048286              |                                |
| <i>GAPDH</i>      | Hs_GAPDH_1_SG                                               | QT00079247              |                                |
| <i>MBL2</i>       | Hs_MBL2_1_SG                                                | QT01004227              |                                |
| <i>NLRP3</i>      | Hs_NLRP3_1_SG                                               | QT00029771              |                                |
| <i>SERPING1</i>   | Hs_SERPING1_1_SG                                            | QT00053963              |                                |
| <i>ACTA2</i>      | fw: GCCTTGGTGTGTGACAATGG<br>rv: AAAACAGCCCTGGGAGCAT         |                         | RT-qPCR/<br>in-house, Metabion |
| <i>CDH1</i>       | fw: ACAGGCTGGCTGAAAGTGAC<br>rv: CACGGCATGAGAATAGAGGAT       |                         |                                |
| <i>COL1A1</i>     | fw: GGTGGTTTCTTGGTCGGT<br>rv: ATGACGTGATCTGTGACGAG          |                         |                                |
| <i>IL18</i>       | fw: ACTGTAGAGATAATGCACCCCG<br>rv: AGTTACAGCCATACCTCTAGGC    |                         |                                |
| <i>IL1B</i>       | fw: CTCGCCAGTGAAATGATGGCT<br>rv: GTCGGAGATTCGTAGCTGGAT      |                         |                                |
| <i>MAP1</i>       | fw: TGAAGGATGGGACGTGGAGT<br>rv: TGCTCTGACTTGAGTTCGCT        |                         |                                |
| <i>MASP1</i>      | fw: TGCAAAGGTTCCCAGAGACC<br>rv: GCATAAGCCTTCTGGCAGGT        |                         |                                |
| <i>MASP2</i>      | fw: GCGGTTTCTACTGCTCCTGCC<br>rv: CGTGGGTATTCAGGGCTGCTGAGCTC |                         |                                |
| <i>MASP3</i>      | fw: TGCCCAAGGAGTCTGGATGA<br>rv: CCCCCAATGATCCTCTTGACC       |                         |                                |
| <i>MTOR</i>       | fw: TGCCAACTATCTTCGGAACC<br>rv: GCTCGCTTCACCTCAAATTC        |                         |                                |
| <i>RAPTOR</i>     | fw: ACTGATGGAGTCCGAAATGC                                    |                         |                                |

|                                                |                                                                            |                                                    |
|------------------------------------------------|----------------------------------------------------------------------------|----------------------------------------------------|
|                                                | rv: TCATCCGATCCTTCATCCTC                                                   |                                                    |
| <b><i>RICTOR</i></b>                           | fw: GGAAGCCTGTTGATGGTGAT<br>rv: GGCAGCCTGTTTTATGGTGT                       |                                                    |
| <b><i>SMAP</i></b>                             | fw: TACGTCCTGCACCGTAACAAG<br>rv: CAGCCATCTCAGCCCAACC                       |                                                    |
| <b><i>TGFB1</i></b>                            | fw: CATAGCTGACTTCAAGATGTGGT<br>rv: CCTAGTGAGACTTTGAACCGT                   |                                                    |
| <b><i>TNFA</i></b>                             | fw: GCTGCACTTTGGAGTGATCG<br>rv: GGGTTTGCTACAACATGGGC                       |                                                    |
| <b><i>VIM</i></b>                              | fw: TGTCCAAATCGATGTGGATGTTTC<br>rv: TTGTACCATTCTTCTGCCTCCTG                |                                                    |
| <b><i>ARMS_375</i></b><br>(SNP ID: rs3750846)  | fw:<br>GCATTTCTAATATCAAATCAAACATTC<br>AT<br>rv: CCTGGGGCTCTGTTTGAATTG      |                                                    |
| <b><i>C2_116</i></b><br>(SNP ID: rs116503776)  | fw: AGCACCATCTACACTTCGCC<br>rv: CATGGCCCTTACCTCGACAT                       |                                                    |
| <b><i>C2_144</i></b><br>(SNP ID: rs144629244)  | fw: CAGGGGGAGATCAGAATCGTC<br>rv: GTGGGGGCAGGGAAATTCTTT                     |                                                    |
| <b><i>C3_147</i></b><br>(SNP ID: rs147859257)  | fw: TTGCCTCTCCTAAGCCTGTG<br>rv: GGCTAGGGTCTCACGAGG                         |                                                    |
| <b><i>C3_223</i></b><br>(SNP ID: rs2230199)    | fw: CTGGATGAAGAGGTACCCGC<br>rv: CTTGGAACAGACCCCTGACA                       |                                                    |
| <b><i>C9_623</i></b><br>(SNP ID: rs62358361)   | fw: TCTGTGACAATGGCAGACAAC<br>rv: TTTATTCCCCACTCTCTGTTATCTT                 |                                                    |
| <b><i>CFH_106</i></b><br>(SNP ID: rs1061170)   | fw:<br>CCTTTGTTAGTAACTTTAGTTCGTCTT<br>rv: GGAGTAGGAGACCAGCCATTC            | PCR for genetic<br>analysis/<br>in-house, Metabion |
| <b><i>CFH_109</i></b><br>(SNP ID: rs10922109)  | fw: AGTCTACCTTGCTAACGGTTC<br>rv: CCTTCTAGATTGTAGTACCTGTTGCT                |                                                    |
| <b><i>CFH_121</i></b><br>(SNP ID: rs121913059) | fw: CAGATCCGTGTGTAATATCCCGA<br>rv: TAAGAAGAGAGCCACCGGTCTCA                 |                                                    |
| <b><i>CFH_570</i></b><br>(SNP ID: rs570618)    | fw: AGTGGTGAGGAAAAATGTAGAATGT<br>rv: CATCTCCATCTTTCTTAAATTCTGTGA           |                                                    |
| <b><i>CFH_618</i></b><br>(SNP ID: rs61818925)  | fw: GTGCATTACAGGGGCATATTC<br>rv: CCTGAAGACACAAATCTCACTGG                   |                                                    |
| <b><i>CFHRI</i></b>                            | fw: GGATCCATGTGGCTCCTGGTCAGTG<br>rv:<br>CTCGAGTCTTTTTGCACAAGTTGGATAC<br>TC |                                                    |
| <b><i>CFI_100</i></b><br>(SNP ID: rs10033900)  | fw: CCTGCAGTGTGGTCTGTGAG<br>rv: CCAGTGCTACAAGGTGGGAA                       |                                                    |
| <b><i>CFI_141</i></b><br>(SNP ID: rs141853578) | fw: ATCCACTGATACAAGCGCTCA<br>rv: TTAAAATCGTCATGATGTTCAAAGC                 |                                                    |
